# Supplementary material for: Construction and Validation of a Predictive Nomogram for Prolonged Hospitalization in Elderly Patients with Hip Fractures: A Retrospective Cohort Study Incorporating Modifiable and Non-Modifiable Risk Factors
Source: Research Square preprint supplement (doi:10.21203/rs.3.rs-6538550/v1), 2025-06-03
Supplement: Supplementary file 1 [file 4ab01a317cd694427b0a7ce5.docx]

**Table S1.**

Assessment of Equilibrium Between Training and Testing sets

| Variables | Total (n = 1674) | test (n = 503) | train (n = 1171) | Statistic | *P* |
| --- | --- | --- | --- | --- | --- |
|
| Gender, n(%) |  |  |  | χ²=1.353 | 0.245 |
| Female | 819 (48.93) | 257 (51.09) | 562 (47.99) |  |  |
| Male | 855 (51.08) | 246 (48.91) | 609 (52.01) |  |  |
| Age(year), M (Q₁, Q₃) | 78.00 (69.00, 87.00) | 79.00 (69.50, 87.00) | 77.000 (69.00, 86.00) | Z=-1.667 | 0.095 |
| BMI(Kg/m2), n(%) |  |  |  | χ²=7.569 | 0.056 |
| ≤18.4 | 180 (10.75) | 54 (10.74) | 126 (10.76) |  |  |
| ≥28.0 | 320 (19.12) | 79 (15.70) | 241 (20.58) |  |  |
| 18.5-23.9 | 660 (39.43) | 219 (43.54) | 441 (37.66) |  |  |
| 24.0-27.9 | 514 (30.70) | 151 (30.02) | 363 (31.00) |  |  |
| Fracturec type, n(%) |  |  |  | χ²=1.239 | 0.538 |
| Femoral neck fracture | 858 (51.25) | 249 (49.50) | 609 (52.01) |  |  |
| Intertrochanteric fracture | 640 (38.23) | 196 (38.97) | 444 (37.92) |  |  |
| Subtrochanteric fracture | 176 (10.51) | 58 (11.53) | 118 (10.08) |  |  |
| Injury mechanism, n(%) |  |  |  | χ²=1.906 | 0.167 |
| High-energy injury | 468 (27.96) | 129 (25.65) | 339 (28.95) |  |  |
| Low-energy injury | 1206 (72.04) | 374 (74.35) | 832 (71.05) |  |  |
| Multiple traumas, n(%) |  |  |  | χ²=0.700 | 0.403 |
| No | 1548 (92.47) | 461 (91.65) | 1087 (92.83) |  |  |
| Yes | 126 (7.53) | 42 (8.35) | 84 (7.17) |  |  |
| Time from injury to admission, n(%) |  |  |  | χ²=1.804 | 0.179 |
| ＞24h | 518 (30.94) | 144 (28.63) | 374 (31.94) |  |  |
| ≤24h | 1156 (69.06) | 359 (71.37) | 797 (68.06) |  |  |
| Surgical approach, n(%) |  |  |  | χ²=0.232 | 0.630 |
| Hip arthroplasty | 1007 (60.16) | 307 (61.03) | 700 (59.78) |  |  |
| Internal fixation | 667 (39.84) | 196 (38.97) | 471 (40.22) |  |  |
| Date from admission to surgery, n(%) |  |  |  | χ²=2.120 | 0.145 |
| ＞48h | 477 (28.50) | 131 (26.04) | 346 (29.55) |  |  |
| ≤48h | 1197 (71.50) | 372 (73.96) | 825 (70.45) |  |  |
| Operative time(min), M (Q₁, Q₃) | 96.00 (78.00, 112.75) | 96.00 (79.00, 113.00) | 96.00 (77.00, 112.00) | Z=-0.575 | 0.565 |
| Intraoperative blood loss(ml), M (Q₁, Q₃) | 170.00 (110.00, 240.00) | 170.00 (110.00, 240.00) | 170.00 (110.00, 240.00) | Z=-0.068 | 0.946 |
| Blood transfusion, n(%) |  |  |  | χ²=0.789 | 0.374 |
| No | 1167 (69.71) | 343 (68.19) | 824 (70.37) |  |  |
| Yes | 507 (30.29) | 160 (31.81) | 347 (29.63) |  |  |
| Anesthesia method, n(%) |  |  |  | χ²=1.549 | 0.213 |
| General | 1347 (80.47) | 414 (82.31) | 933 (79.68) |  |  |
| No-general | 327 (19.53) | 89 (17.69) | 238 (20.32) |  |  |
| ASA classification, n(%) |  |  |  | χ²=0.383 | 0.536 |
| Ⅰ-Ⅱ | 826 (49.343) | 254 (50.497) | 572 (48.847) |  |  |
| Ⅲ-Ⅳ | 848 (50.657) | 249 (49.503) | 599 (51.153) |  |  |
| ICU transfer, n(%) |  |  |  | χ²=0.774 | 0.379 |
| No | 1382 (82.56) | 409 (81.31) | 973 (83.09) |  |  |
| Yes | 292 (17.44) | 94 (18.69) | 198 (16.91) |  |  |
| Smoking, n(%) |  |  |  | χ²=0.088 | 0.767 |
| No | 1183 (70.67) | 358 (71.17) | 825 (70.45) |  |  |
| Yes | 491 (29.33) | 145 (28.83) | 346 (29.55) |  |  |
| Drinking, n(%) |  |  |  | χ²=0.008 | 0.930 |
| No | 1164 (69.53) | 349 (69.38) | 815 (69.60) |  |  |
| Yes | 510 (30.47) | 154 (30.62) | 356 (30.40) |  |  |
| Hypertension, n(%) |  |  |  | χ²=0.567 | 0.452 |
| No | 1002 (59.86) | 308 (61.23) | 694 (59.27) |  |  |
| Yes | 672 (40.14) | 195 (38.77) | 477 (40.73) |  |  |
| Coronary artery disease, n(%) |  |  |  | χ²=0.006 | 0.940 |
| No | 1356 (81.00) | 408 (81.11) | 948 (80.96) |  |  |
| Yes | 318 (19.00) | 95 (18.89) | 223 (19.04) |  |  |
| Heart failure, n(%) |  |  |  | χ²=0.163 | 0.686 |
| No | 1249 (74.61) | 372 (73.96) | 877 (74.89) |  |  |
| Yes | 425 (25.39) | 131 (26.04) | 294 (25.11) |  |  |
| Arrhythmia, n(%) |  |  |  | χ²=0.000 | 0.988 |
| No | 1494 (89.25) | 449 (89.26) | 1045 (89.24) |  |  |
| Yes | 180 (10.75) | 54 (10.74) | 126 (10.76) |  |  |
| Diabetes, n(%) |  |  |  | χ²=2.868 | 0.090 |
| No | 1337 (79.87) | 389 (77.34) | 948 (80.96) |  |  |
| Yes | 337 (20.13) | 114 (22.66) | 223 (19.04) |  |  |
| Cerebrovascular disease, n(%) |  |  |  | χ²=0.913 | 0.339 |
| No | 1182 (70.61) | 347 (68.99) | 835 (71.31) |  |  |
| Yes | 492 (29.39) | 156 (31.01) | 336 (28.69) |  |  |
| Alzheimer, n(%) |  |  |  | χ²=0.008 | 0.929 |
| No | 1592 (95.10) | 478 (95.03) | 1114 (95.13) |  |  |
| Yes | 82 (4.90) | 25 (4.97) | 57 (4.87) |  |  |
| Parkinson, n(%) |  |  |  | χ²=1.263 | 0.261 |
| No | 1607 (96.00) | 487 (96.82) | 1120 (95.65) |  |  |
| Yes | 67 (4.00) | 16 (3.18) | 51 (4.35) |  |  |
| Hemiplegia, n(%) |  |  |  | χ²=0.029 | 0.865 |
| No | 1434 (85.66) | 432 (85.89) | 1002 (85.57) |  |  |
| Yes | 240 (14.34) | 71 (14.11) | 169 (14.43) |  |  |
| COPD or pulmonary fibrosis, n(%) |  |  |  | χ²=0.532 | 0.466 |
| No | 1147 (68.52) | 351 (69.78) | 796 (67.98) |  |  |
| Yes | 527 (31.48) | 152 (30.22) | 375 (32.02) |  |  |
| Malignant Tumor, n(%) |  |  |  | χ²=0.001 | 0.974 |
| No | 1497 (89.43) | 450 (89.46) | 1047 (89.41) |  |  |
| Yes | 177 (10.57) | 53 (10.54) | 124 (10.59) |  |  |
| Delirium, n(%) |  |  |  | χ²=0.520 | 0.471 |
| No | 1527 (91.22) | 455 (90.46) | 1072 (91.55) |  |  |
| Yes | 147 (8.78) | 48 (9.54) | 99 (8.45) |  |  |
| Lower extremity vascular disease, n(%) |  |  |  | χ²=0.069 | 0.793 |
| No | 1417 (84.65) | 424 (84.29) | 993 (84.80) |  |  |
| Yes | 257 (15.35) | 79 (15.71) | 178 (15.20) |  |  |
| Number of comorbidities, n(%) |  |  |  | χ²=0.110 | 0.740 |
| ＞4 | 556 (33.21) | 170 (33.80) | 386 (32.96) |  |  |
| ≤4 | 1118 (66.79) | 333 (66.20) | 785 (67.034) |  |  |
| RBC(109/L), M (Q₁, Q₃) | 4.50 (4.00, 5.01) | 4.52 (4.01, 5.04) | 4.50 (3.98, 4.99) | Z=-0.767 | 0.443 |
| WBC(1012/L), M (Q₁, Q₃) | 6.95 (4.97, 9.05) | 6.84 (4.79, 8.86) | 6.99 (5.04, 9.13) | Z=-1.095 | 0.273 |
| Pre Hb(G/L), M (Q₁, Q₃) | 115.00 (99.00, 130.00) | 115.00 (98.00, 130.00) | 115.00 (100.00, 130.00) | Z=-0.141 | 0.888 |
| PLT(109/L), M (Q₁, Q₃) | 200.00 (150.25, 250.00) | 193.00 (143.00, 246.00) | 203.00 (153.00, 251.00) | Z=-1.322 | 0.186 |
| N(%), M (Q₁, Q₃) | 55.90 (42.83, 67.60) | 56.60 (43.65, 68.10) | 55.40 (42.60, 67.45) | Z=-0.944 | 0.345 |
| HCT(%), M (Q₁, Q₃) | 35.10 (30.10, 40.10) | 34.90 (30.30, 39.80) | 35.30 (30.00, 40.20) | Z=-0.614 | 0.539 |
| K(mmol/L), M (Q₁, Q₃) | 3.99 (3.54, 4.48) | 3.96 (3.54, 4.44) | 4.000 (3.54, 4.50) | Z=-0.841 | 0.401 |
| Ca(mmol/L), M (Q₁, Q₃) | 2.40 (2.10, 2.72) | 2.42 (2.11, 2.74) | 2.39 (2.09, 2.71) | Z=-1.104 | 0.270 |
| Na(mmol/L), M (Q₁, Q₃) | 135.00 (130.00, 139.80) | 134.30 (130.25, 139.55) | 135.10 (129.95, 139.90) | Z=-0.319 | 0.750 |
| Pre Alb(G/L), M (Q₁, Q₃) | 36.70 (35.00, 38.30) | 36.70 (35.05, 38.25) | 36.70 (34.90, 38.40) | Z=-0.391 | 0.696 |
| ALT(U/L), M (Q₁, Q₃) | 32.00 (19.00, 46.00) | 33.00 (19.00, 46.00) | 32.00 (18.50, 47.00) | Z=-0.199 | 0.843 |
| AST(U/L), M (Q₁, Q₃) | 34.00 (19.00, 47.00) | 33.00 (19.00, 48.00) | 34.00 (19.00, 47.00) | Z=-0.264 | 0.792 |
| LDH(U/L), M (Q₁, Q₃) | 192.00 (135.00, 247.00) | 199.00 (132.00, 248.50) | 190.00 (136.00, 247.00) | Z=-0.443 | 0.658 |
| BUN(mmol/L), M (Q₁, Q₃) | 6.00 (4.00, 8.00) | 6.10 (4.00, 8.20) | 6.000 (3.90, 8.00) | Z=-1.021 | 0.307 |
| Cr(μmol/L), M (Q₁, Q₃) | 95.00 (66.00, 125.00) | 93.00 (65.50, 125.50) | 96.00 (67.00, 124.50) | Z=-0.289 | 0.773 |
| PT(s), M (Q₁, Q₃) | 12.90 (10.30, 15.30) | 12.70 (10.00, 15.30) | 12.90 (10.40, 15.40) | Z=-1.097 | 0.273 |
| APTT(s), M (Q₁, Q₃) | 29.90 (22.30, 37.30) | 30.00 (22.35, 37.25) | 29.90 (22.30, 37.40) | Z=-0.146 | 0.884 |
| INR, M (Q₁, Q₃) | 1.16 (0.98, 1.33) | 1.15 (0.98, 1.32) | 1.16 (0.98, 1.34) | Z=-0.663 | 0.507 |
| FIB(g/L), M (Q₁, Q₃) | 3.20 (2.30, 4.10) | 3.10 (2.30, 4.10) | 3.20 (2.40, 4.10) | Z=-0.841 | 0.400 |
| D Dimer(mg/L), M (Q₁, Q₃) | 0.70 (0.41, 1.01) | 0.69 (0.41, 0.98) | 0.70 (0.41, 1.05) | Z=-0.495 | 0.621 |
| Post Hb(G/L), M (Q₁, Q₃) | 106.00 (91.00, 116.00) | 105.00 (91.00, 116.00) | 106.00 (91.00, 116.00) | Z=-0.217 | 0.829 |
| Post Alb(G/L), M (Q₁, Q₃) | 36.70 (35.00, 38.40) | 36.70 (35.00, 38.40) | 36.70 (34.90, 38.30) | Z=-0.504 | 0.614 |
| AV(m/s), M (Q₁, Q₃) | 1.01 (0.74, 1.27) | 1.02 (0.70, 1.26) | 1.00 (0.73, 1.27) | Z=-0.880 | 0.379 |
| EF(%), M (Q₁, Q₃) | 60.00 (54.00, 65.75) | 59.00 (54.00, 65.00) | 60.00 (54.00, 66.00) | Z=-1.344 | 0.179 |
| Z: Mann-Whitney test, χ²: Chi-square test, M: Median, Q₁: 1st Quartile, Q₃: 3st Quartile, BMI: body mass index, ASA: American Society of Anesthesiologist, ICU: intensive care unit, COPD: chronic obstructive pulmonary disease, RBC: Red blood cell, WBC: White blood cell; Pre Hb: Preoperative hemoglobin, PLT: Platelets; N: Neutrophile granulocyte; HCT: Hematocrit; K: Kalium; Ca: Calcium; Na: Natrium; Pre Alb: Preoperative albumin; ALT: Alanine aminotransferase; AST: Aspartate aminotransferase; LDH: Lactate dehydrogenase; BUN: Blood urea nitrogen; Cr: Creatinine; PT: Prothrombin time; APTT: Activated partial thromboplastin time; INR: International normalized ratio; FIB: Fibrinogen; AV: Aortic velocity; EF: Ejection fraction. | | | | | |
