# Supplementary material for: Construction and Validation of a Predictive Nomogram for Prolonged Hospitalization in Elderly Patients with Hip Fractures: A Retrospective Cohort Study Incorporating Modifiable and Non-Modifiable Risk Factors
Source: Research Square preprint supplement (doi:10.21203/rs.3.rs-6538550/v1), 2025-06-03
Supplement: Supplementary file 2 [file b236738e1c70175805a20746.docx]

**Table S2.**

Baseline Characteristics of the Training Set

| Variables | Total  (n = 1171) | Non-PLH  (n = 872) | PLH (n = 299) | Statistic | *P* |
| --- | --- | --- | --- | --- | --- |
|
| Gender, n(%) |  |  |  | χ²=1.624 | 0.203 |
| Female | 562 (47.99) | 428 (49.08) | 134 (44.82) |  |  |
| Male | 609 (52.01) | 444 (50.92) | 165 (55.18) |  |  |
| Age(year), M (Q₁, Q₃) | 77.00 (69.00, 86.00) | 77.00 (68.00, 86.00) | 79.00 (69.00, 88.00) | Z=-1.528 | 0.126 |
| BMI(Kg/m2), n(%) |  |  |  | χ²=2.353 | 0.502 |
| ≤18.4 | 126 (10.76) | 98 (11.24) | 28 (9.37) |  |  |
| ≥28.0 | 241 (20.58) | 182 (20.87) | 59 (19.73) |  |  |
| 18.5-23.9 | 441 (37.66) | 318 (36.47) | 123 (41.14) |  |  |
| 24.0-27.9 | 363 (31.00) | 274 (31.42) | 89 (29.76) |  |  |
| Fracturec type, n(%) |  |  |  | χ²=5.674 | 0.059 |
| Femoral neck fracture | 609 (52.01) | 453 (51.95) | 156 (52.17) |  |  |
| Intertrochanteric fracture | 444 (37.92) | 321 (36.81) | 123 (41.14) |  |  |
| Subtrochanteric fracture | 118 (10.07) | 98 (11.24) | 20 (6.69) |  |  |
| Injury mechanism, n(%) |  |  |  | χ²=5.206 | **0.023** |
| High-energy injury | 339 (28.95) | 237 (27.18) | 102 (34.11) |  |  |
| Low-energy injury | 832 (71.05) | 635 (72.82) | 197 (65.89) |  |  |
| Multiple traumas, n(%) |  |  |  | χ²=0.014 | 0.907 |
| No | 1087 (92.83) | 809 (92.78) | 278 (92.98) |  |  |
| Yes | 84 (7.17) | 63 (7.22) | 21 (7.02) |  |  |
| Time from injury to admission, n(%) |  |  |  | χ²=2.731 | 0.098 |
| ＞24h | 374 (31.94) | 290 (33.26) | 84 (28.09) |  |  |
| ≤24h | 797 (68.06) | 582 (66.74) | 215 (71.91) |  |  |
| Surgical approach, n(%) |  |  |  | χ²=0.030 | 0.863 |
| Hip arthroplasty | 700 (59.78) | 520 (59.63) | 180 (60.20) |  |  |
| Internal fixation | 471 (40.22) | 352 (40.37) | 119 (39.80) |  |  |
| Time from admission to surgery, n(%) |  |  |  | χ²=408.814 | **<.001** |
| ＞48h | 346 (29.55) | 120 (13.76) | 226 (75.59) |  |  |
| ≤48h | 825 (70.45) | 752 (86.24) | 73 (24.41) |  |  |
| Operative time(min), M (Q₁, Q₃) | 96.00 (77.00, 112.00) | 96.00 (78.00, 113.00) | 95.00 (76.50, 112.00) | Z=-0.715 | 0.475 |
| Intraoperative blood loss(ml), M (Q₁, Q₃) | 170.00 (110.00, 240.00) | 170.00 (110.00, 240.00) | 180.00 (110.00, 240.00) | Z=-0.320 | 0.749 |
|  |  |  |  |  |  |
| Blood transfusion, n(%) |  |  |  | χ²=0.003 | 0.953 |
| No | 824 (70.37) | 614 (70.41) | 210 (70.23) |  |  |
| Yes | 347 (29.63) | 258 (29.59) | 89 (29.77) |  |  |
| Anesthesia method, n(%) |  |  |  | χ²=0.923 | 0.337 |
| General | 933 (79.68) | 689 (79.01) | 244 (81.60) |  |  |
| No-general | 238 (20.32) | 183 (20.99) | 55 (18.40) |  |  |
| ASA classification, n(%) |  |  |  | χ²=0.459 | 0.498 |
| Ⅰ-Ⅱ | 572 (48.85) | 431 (49.43) | 141 (47.16) |  |  |
| Ⅲ-Ⅳ | 599 (51.15) | 441 (50.57) | 158 (52.84) |  |  |
| ICU transfer, n(%) |  |  |  | χ²=0.006 | 0.937 |
| No | 973 (83.09) | 725 (83.14) | 248 (82.94) |  |  |
| Yes | 198 (16.91) | 147 (16.86) | 51 (17.06) |  |  |
| Smoking, n(%) |  |  |  | χ²=0.003 | 0.959 |
| No | 825 (70.45) | 614 (70.41) | 211 (70.57) |  |  |
| Yes | 346 (29.55) | 258 (29.59) | 88 (29.43) |  |  |
| Drinking, n(%) |  |  |  | χ²=0.739 | 0.390 |
| No | 815 (69.60) | 601 (68.92) | 214 (71.57) |  |  |
| Yes | 356 (30.40) | 271 (31.08) | 85 (28.43) |  |  |
| Hypertension, n(%) |  |  |  | χ²=0.716 | 0.397 |
| No | 694 (59.27) | 523 (59.98) | 171 (57.19) |  |  |
| Yes | 477 (40.73) | 349 (40.02) | 128 (42.81) |  |  |
| Coronary artery disease, n(%) |  |  |  | χ²=0.746 | 0.388 |
| No | 948 (80.96) | 711 (81.54) | 237 (79.26) |  |  |
| Yes | 223 (19.04) | 161 (18.46) | 62 (20.74) |  |  |
| Heart failure, n(%) |  |  |  | χ²=54.874 | **<.001** |
| No | 877 (74.89) | 701 (80.39) | 176 (58.86) |  |  |
| Yes | 294 (25.11) | 171 (19.61) | 123 (41.14) |  |  |
| Arrhythmia, n(%) |  |  |  | χ²=0.001 | 0.970 |
| No | 1045 (89.24) | 778 (89.22) | 267 (89.30) |  |  |
| Yes | 126 (10.76) | 94 (10.78) | 32 (10.70) |  |  |
| Diabetes, n(%) |  |  |  | χ²=0.026 | 0.873 |
| No | 948 (80.96) | 705 (80.85) | 243 (81.27) |  |  |
| Yes | 223 (19.04) | 167 (19.15) | 56 (18.73) |  |  |
| Cerebrovascular disease, n(%) |  |  |  | χ²=0.014 | 0.906 |
| No | 835 (71.31) | 621 (71.22) | 214 (71.57) |  |  |
| Yes | 336 (28.69) | 251 (28.78) | 85 (28.43) |  |  |
| Alzheimer, n(%) |  |  |  | χ²=0.633 | 0.426 |
| No | 1114 (95.13) | 827 (94.84) | 287 (95.99) |  |  |
| Yes | 57 (4.87) | 45 (5.16) | 12 (4.01) |  |  |
| Parkinson, n(%) |  |  |  | χ²=1.744 | 0.187 |
| No | 1120 (95.65) | 830 (95.18) | 290 (96.99) |  |  |
| Yes | 51 (4.35) | 42 (4.82) | 9 (3.01) |  |  |
| Hemiplegia, n(%) |  |  |  | χ²=73.150 | **<.001** |
| No | 1002 (85.57) | 791 (90.71) | 211 (70.57) |  |  |
| Yes | 169 (14.43) | 81 (9.29) | 88 (29.43) |  |  |
| COPD or pulmonary fibrosis, n(%) |  |  |  | χ²=1.765 | 0.184 |
| No | 796 (67.98) | 602 (69.04) | 194 (64.88) |  |  |
| Yes | 375 (32.02) | 270 (30.96) | 105 (35.12) |  |  |
| Malignant Tumor, n(%) |  |  |  | χ²=0.636 | 0.425 |
| No | 1047 (89.41) | 776 (88.99) | 271 (90.64) |  |  |
| Yes | 124 (10.59) | 96 (11.01) | 28 (9.36) |  |  |
| Delirium, n(%) |  |  |  | χ²=0.004 | 0.947 |
| No | 1072 (91.55) | 798 (91.51) | 274 (91.64) |  |  |
| Yes | 99 (8.45) | 74 (8.49) | 25 (8.36) |  |  |
| Lower extremity vascular disease, n(%) |  |  |  | χ²=28.400 | **<.001** |
| No | 993 (84.80) | 768 (88.07) | 225 (75.25) |  |  |
| Yes | 178 (15.20) | 104 (11.93) | 74 (24.75) |  |  |
| Number of comorbidities, n(%) |  |  |  | χ²=20.090 | **<.001** |
| ＞4 | 386 (32.96) | 256 (29.36) | 130 (43.48) |  |  |
| ≤4 | 785 (67.04) | 616 (70.64) | 169 (56.52) |  |  |
| RBC(109/L), M (Q₁, Q₃) | 4.50 (3.98, 4.99) | 4.77 (4.38, 5.13) | 3.490 (3.28, 3.73) | Z=-25.834 | **<.001** |
| WBC(1012/L), M (Q₁, Q₃) | 6.99 (5.04, 9.13) | 6.90 (5.03, 9.12) | 7.210 (5.13, 9.18) | Z=-1.014 | 0.310 |
| Pre Hb(G/L), M (Q₁, Q₃) | 115.00 (100.00, 130.00) | 119.00 (105.00, 130.00) | 103.00 (88.00, 120.00) | Z=-9.626 | **<.001** |
| Pre Hb, M (Q₁, Q₃) | 115.00 (100.00, 130.00) | 119.00 (105.00, 130.00) | 103.00 (88.00, 120.00) | Z=-9.626 | **<.001** |
| PLT(109/L), M (Q₁, Q₃) | 203.00 (153.00, 251.00) | 203.00 (151.00, 251.25) | 204.00 (160.00, 251.00) | Z=-0.546 | 0.585 |
| N(%), M (Q₁, Q₃) | 55.40 (42.60, 67.45) | 56.10 (42.60, 67.80) | 53.60 (42.85, 65.60) | Z=-0.883 | 0.377 |
| HCT(%), M (Q₁, Q₃) | 35.30 (30.00, 40.20) | 35.30 (30.10, 40.53) | 35.50 (29.90, 39.70) | Z=-0.338 | 0.736 |
| K(mmol/L), M (Q₁, Q₃) | 4.00 (3.54, 4.50) | 4.00 (3.54, 4.50) | 3.97 (3.54, 4.47) | Z=-0.541 | 0.589 |
| Ca(mmol/L), M (Q₁, Q₃) | 2.39 (2.09, 2.71) | 2.39 (2.09, 2.72) | 2.39 (2.10, 2.68) | Z=-0.418 | 0.676 |
| Na(mmol/L), M (Q₁, Q₃) | 135.10 (129.95, 139.90) | 135.10 (130.10, 140.00) | 135.00 (128.90, 139.80) | Z=-0.934 | 0.350 |
| Pre Alb(G/L), M (Q₁, Q₃) | 36.70 (34.90, 38.40) | 37.60 (36.30, 38.80) | 32.70 (31.50, 33.80) | Z=-25.833 | **<.001** |
| ALT(U/L), M (Q₁, Q₃) | 32.00 (18.50, 47.00) | 32.00 (19.00, 47.00) | 31.00 (18.00, 46.50) | Z=-0.719 | 0.472 |
| AST(U/L), M (Q₁, Q₃) | 34.00 (19.00, 47.00) | 34.00 (19.00, 47.00) | 33.00 (19.00, 47.00) | Z=-0.482 | 0.630 |
| LDH(U/L), M (Q₁, Q₃) | 190.00 (136.00, 247.00) | 192.00 (138.00, 247.00) | 181.00 (131.00, 244.00) | Z=-1.275 | 0.202 |
| BUN(mmol/L), M (Q₁, Q₃) | 6.00 (3.90, 8.00) | 6.00 (4.00, 8.00) | 5.60 (3.80, 7.85) | Z=-1.167 | 0.243 |
| Cr(μmol/L), M (Q₁, Q₃) | 96.00 (67.00, 124.50) | 96.00 (68.00, 125.00) | 96.00 (63.50, 124.00) | Z=-1.180 | 0.238 |
| PT(s), M (Q₁, Q₃) | 12.90 (10.40, 15.40) | 12.90 (10.30, 15.30) | 13.20 (10.90, 15.55) | Z=-1.573 | 0.116 |
| APTT(s), M (Q₁, Q₃) | 29.90 (22.30, 37.40) | 30.50 (22.60, 37.60) | 29.10 (21.55, 36.40) | Z=-1.463 | 0.143 |
| INR, M (Q₁, Q₃) | 1.16 (0.98, 1.34) | 1.17 (0.97, 1.34) | 1.15 (0.98, 1.33) | Z=-0.150 | 0.881 |
| FIB(g/L), M (Q₁, Q₃) | 3.200 (2.40, 4.10) | 3.200 (2.30, 4.10) | 3.300 (2.45, 4.00) | Z=-0.834 | 0.404 |
| D Dimer(mg/L), M (Q₁, Q₃) | 0.70 (0.41, 1.05) | 0.58 (0.32, 0.78) | 2.02 (1.53, 2.49) | Z=-25.835 | **<.001** |
| Post Hb(G/L), M (Q₁, Q₃) | 106.00 (91.00, 116.00) | 106.00 (91.00, 116.00) | 105.00 (90.00, 115.00) | Z=-0.812 | 0.417 |
| Post Alb(G/L), M (Q₁, Q₃) | 36.70 (34.90, 38.30) | 37.60 (36.20, 38.70) | 32.10 (30.95, 33.50) | Z=-25.834 | **<.001** |
| AV(m/s), M (Q₁, Q₃) | 1.00 (0.73, 1.27) | 1.00 (0.730, 1.28) | 1.00 (0.74, 1.24) | Z=-0.141 | 0.888 |
| EF(%), M (Q₁, Q₃) | 60.00 (54.00, 66.00) | 57.00 (53.00, 61.00) | 69.00 (67.00, 70.00) | Z=-25.858 | **<.001** |
| Z: Mann-Whitney test, χ²: Chi-square test, M: Median, Q₁: 1st Quartile, Q₃: 3st Quartile, BMI: body mass index, ASA: American Society of Anesthesiologist, ICU: intensive care unit, COPD: chronic obstructive pulmonary disease, RBC: Red blood cell, WBC: White blood cell; Pre Hb: Preoperative hemoglobin, PLT: Platelets; N: Neutrophile granulocyte; HCT: Hematocrit; K: Kalium; Ca: Calcium; Na: Natrium; Pre Alb: Preoperative albumin; ALT: Alanine aminotransferase; AST: Aspartate aminotransferase; LDH: Lactate dehydrogenase; BUN: Blood urea nitrogen; Cr: Creatinine; PT: Prothrombin time; APTT: Activated partial thromboplastin time; INR: International normalized ratio; FIB: Fibrinogen; AV: Aortic velocity; EF: Ejection fraction. | | | | | |
