# Supplementary material for: Construction and Validation of a Predictive Nomogram for Prolonged Hospitalization in Elderly Patients with Hip Fractures: A Retrospective Cohort Study Incorporating Modifiable and Non-Modifiable Risk Factors
Source: Research Square preprint supplement (doi:10.21203/rs.3.rs-6538550/v1), 2025-06-03
Supplement: Supplementary file 3 [file ea47b06fab22ae1ac6354e25.docx]

**Table S3.**

Confusion Matrix for Training and Testing Sets

| Data | AUC (95%CI) | Accuracy (95%CI) | Sensitivity (95%CI) | Specificity (95%CI) | PPV (95%CI) | NPV (95%CI) | F1-score  (95%CI) | cut off |
| --- | --- | --- | --- | --- | --- | --- | --- | --- |
| Train | 0.89 (0.87-0.91) | 0.85 (0.83-0.87) | 0.87  (0.85 - 0.90) | 0.77  (0.72 - 0.82) | 0.92  (0.90 - 0.94) | 0.67  (0.62 - 0.72) | 0.89 (0.88-0.91) | 0.295 |
| Test | 0.87 (0.83-0.91) | 0.84 (0.81-0.87) | 0.87  (0.84 - 0.91) | 0.75  (0.68 - 0.83) | 0.91  (0.89 - 0.94) | 0.66  (0.58 - 0.74) | 0.89 (0.87-0.92) | 0.295 |
| AUC: Area Under the Curve, PPV: Positive Predictive Value, NPV: Negative Predictive Value. | | | | | | | | |
